# Supplementary material
Source: MDPI journal article supplement (https://www.mdpi.com/2073-4395/12/1/112)
Supplement: s1 [file s1]

**Table S1.** The Spearman's rank correlation coefficients calculated between plant's linear parameters and yield components between NILs from field and plot. \* - significant at  $p < 0,05$ .

| Field/Plot                 | Height of plant, cm | Number of spike per plant | Length of spike, cm | Density of spike | Number of seeds per plant | Mass of seeds per plant, g | Germination of plants, % | Mass of 1000 seeds, g |
|----------------------------|---------------------|---------------------------|---------------------|------------------|---------------------------|----------------------------|--------------------------|-----------------------|
| Height of plant, cm        | 0,603509*           | 0,396491                  | 0,471930            | -0,029877        | 0,374782                  | 0,409808                   | -0,091712                | 0,600000*             |
| Number of spike per plant  | -0,122807           | -0,040351                 | -0,147368           | 0,137083         | -0,038529                 | 0,098074                   | 0,483252                 | 0,221053              |
| Length of spike, cm        | 0,161687            | 0,390159                  | 0,383129            | 0,110915         | 0,378950                  | 0,421055                   | 0,088340                 | 0,274166              |
| Density of spike           | -0,343860           | 0,196491                  | -0,092982           | 0,513182         | 0,049037                  | 0,227671                   | 0,061729                 | -0,124561             |
| Number of seeds per plant  | -0,224168           | 0,003503                  | -0,115587           | 0,150878         | -0,027972                 | 0,111888                   | 0,482406                 | 0,199650              |
| Mass of seeds per plant, g | -0,283713           | 0,136603                  | -0,196147           | 0,333335         | 0,076923                  | 0,202797                   | 0,630297*                | 0,171629              |
| Germination of plants, %   | 0,236335            | 0,257499                  | 0,165787            | 0,392229         | 0,140849                  | 0,105636                   | -0,166667                | 0,137568              |
| Mass of 1000 seeds, g      | -0,399300           | 0,262697                  | -0,231174           | 0,536845         | 0,125874                  | 0,160839                   | 0,443673                 | 0,035026              |
