# Supplementary material
Source: MDPI journal article supplement (https://www.mdpi.com/2073-4395/12/1/112)
Supplement: s1 [file s1]

**Table S2.** . Effects of the anthocyanins and melanins accumulation on morphological parameters of barley plants growing in field and plot assayed by Kruskal–Wallis H-test; degrees of freedom (df): 1. Each group includes 120 plants. \* - significant p-value.

|                           | Anthocyanins |              |         |         |      |              |         |         |
|---------------------------|--------------|--------------|---------|---------|------|--------------|---------|---------|
| Trait                     | Field        |              |         |         | Plot |              |         |         |
|                           |              | sum of ranks | H       | p-value |      | sum of ranks | H       | p-value |
| Height of plant           | no           | 13355        | 4,25047 | 0,0392* | no   | 12152,5      | 12,894  | 0,0003* |
|                           | yes          | 15565        |         |         | yes  | 14875,5      |         |         |
| Number of spike per plant | no           | 15383        | 3,09263 | 0,0786  | no   | 13243        | 2,1332  | 0,1441  |
|                           | yes          | 13537        |         |         | yes  | 13785        |         |         |
| Spike lengh               | no           | 12951,5      | 9,45764 | 0,0021* | no   | 11169,5      | 33,4889 | 0,0000* |
|                           | yes          | 15968,5      |         |         | yes  | 15858,5      |         |         |
| Density of spike          | no           | 15754        | 6,71892 | 0,0095* | no   | 14155,5      | 0,14742 | 0,7010  |
|                           | yes          | 13166        |         |         | yes  | 12872,5      |         |         |
| Number of seeds per plant | no           | 14807,5      | 0,41776 | 0,5181  | no   | 12817        | 5,18472 | 0,0228* |
|                           | yes          | 14112,5      |         |         | yes  | 14211        |         |         |
| Mass of seeds per plant   | no           | 15258,5      | 2,20682 | 0,1374  | no   | 12848        | 4,91057 | 0,0267* |
|                           | yes          | 13661,5      |         |         | yes  | 14180        |         |         |
|                           |              |              |         |         |      |              |         |         |
|                           | Melanins     |              |         |         |      |              |         |         |
| Trait                     | Field        |              |         |         | Plot |              |         |         |
|                           |              | sum of ranks | H       | p-value |      | sum of ranks | H       | p-value |
| Height of plant           | no           | 14502        | 0,27887 | 0,5974  | no   | 14679,5      | 3,35415 | 0,0670  |
|                           | yes          | 14418        |         |         | yes  | 12348,5      |         |         |
| Number of spike per plant | no           | 13555        | 1,60097 | 0,2058  | no   | 13112,5      | 1,57969 | 0,2088  |
|                           | yes          | 15365        |         |         | yes  | 13915,5      |         |         |
| Spike lengh               | no           | 13943        | 0,31669 | 0,5736  | no   | 14110,5      | 0,5597  | 0,4544  |
|                           | yes          | 14977        |         |         | yes  | 12917,5      |         |         |
| Density of spike          | no           | 11295        | 34,3168 | 0,0000* | no   | 12536        | 7,01285 | 0,0081* |

|                           |     |         |         |         |     |       |         |        |
|---------------------------|-----|---------|---------|---------|-----|-------|---------|--------|
|                           | yes | 17625   |         |         | yes | 14492 |         |        |
| Number of seeds per plant | no  | 13330,5 | 2,73185 | 0,0984  | no  | 13415 | 0,42214 | 0,5159 |
|                           | yes | 15589,5 |         |         | yes | 13613 |         |        |
| Mass of seeds per plant   | no  | 12766,5 | 7,30415 | 0,0069* | no  | 13475 | 0,28326 | 0,5946 |
|                           | yes | 16153,5 |         |         | yes | 13553 |         |        |
